# Supplementary material
Source: HighWire-hosted journal article supplement (https://www.cmajopen.ca/highwire/filestream/80921/field_highwire_adjunct_files/2/open-2016-0031-original-submission.pdf)

1  
2  
3 **The PRIMaC Study: a pragmatic randomised trial of the integration of chronic**  
4 **disease prevention and management services into primary care.**  
5  
6  
7  
8

9  
10 Martin Fortin,<sup>1</sup> Maud-Christine Chouinard,<sup>2</sup> Marie-France Dubois,<sup>3</sup> Martin Bélanger,<sup>4</sup>  
11  
12 José Almirall,<sup>5</sup> Tarek Bouhali,<sup>5</sup> Maxime Sasseville<sup>6</sup>  
13  
14  
15

16  
17 <sup>1</sup> Professor, Family Medicine Department, Université de Sherbrooke, Quebec, Canada  
18

19 <sup>2</sup> Associate professor, Health Sciences Department, Université du Quebec à Chicoutimi,  
20  
21 Quebec, Canada  
22  
23

24 <sup>3</sup> Professor, Community Health Sciences Department, Université de Sherbrooke, Quebec,  
25  
26 Canada  
27

28 <sup>4</sup> General practitioner, Centre intégré universitaire de santé et de services sociaux du  
29  
30 Saguenay–Lac-Saint-Jean, Quebec, Canada  
31  
32

33 <sup>5</sup> Adjunct professor, Département de médecine de famille et de médecine d'urgence,  
34  
35 Université de Sherbrooke, Quebec, Canada  
36  
37

38 <sup>6</sup> Postgraduate student, Faculty of Medicine and Health Sciences, Université de  
39  
40 Sherbrooke, Quebec, Canada  
41  
42  
43  
44

45  
46 **Address correspondence to:** Martin Fortin, Centre intégré universitaire de santé et de  
47  
48 services sociaux du Saguenay–Lac-Saint-Jean, 305 St-Vallier, Chicoutimi (Québec) G7H  
49  
50 5H6; Telephone 418 541-1234 ext. 2818 ; Fax 418 541-7091; email:

51 [Martin.Fortin@usherbrooke.ca](mailto:Martin.Fortin@usherbrooke.ca)  
52  
53  
54  
55  
56  
57  
58  
59  
60

## Abstract

**Background:** Chronic disease prevention and management (CDPM) programs designed to improve patient outcomes are usually single-disease oriented. We evaluated an intervention adapting and integrating CDPM services targeting multiple diseases and risk factors (diabetes, cardiovascular disease, COPD, asthma, tobacco smoking, obesity, hyperlipidemia, carbohydrate intolerance, sedentariness). The intervention included: self-management support and health education, patient-centered and motivational approaches, and inter-professional collaboration.

**Methods:** A pragmatic randomised trial was used to evaluate the intervention. Self-management as a primary outcome was evaluated through the Health Education Impact Questionnaire (heiQ) that measures eight different domains. Secondary outcomes included: self-efficacy, health related quality of life (SF-12), psychological distress, and health behaviours.

**Results:** 332 patients were randomized (166 in both intervention and control groups) and evaluated after three months. The intervention group showed a reliable improvement in six of the eight heiQ domains: health directed behaviour (Relative Risk; 95%CI) (1.71; 1.13-2.59), emotional well-being (1.73; 1.07-2.79), self-monitoring and insight (2.40; 1.19-4.86), constructive attitudes and approaches (2.40; 1.37-4.21), skill and technique acquisition (1.70; 1.14-2.53), and health service navigation (1.93; 1.08-3.47).

Improvement was also observed in the Physical Component Summary ( $p = 0.017$ ) and the Single Index ( $p = 0.041$ ) of the SF-12. The intervention group improved in fruit and vegetable consumption (odd ratio 2.36; 95%CI = 1.41 - 3.95) and physical activity (odd

1  
2  
3 ratio 3.81; 95%CI = 1.65 - 8.76). One-year improvement was maintained in the  
4  
5 intervention group for several outcomes.  
6  
7

8 **Interpretation:** Adapting and integrating chronic disease prevention and management  
9  
10 services into primary care settings yielded positive and promising results.  
11  
12

13  
14  
15 **Trial Registration:** ClinicalTrials.gov Identifier: NCT01319656  
16  
17

18  
19  
20 **Running Head:** Chronic disease management services in primary care  
21  
22

23  
24  
25  
26  
27  
28  
29  
30  
31  
32  
33  
34  
35  
36  
37  
38  
39  
40  
41  
42  
43  
44  
45  
46  
47  
48  
49  
50  
51  
52  
53  
54  
55  
56  
57  
58  
59  
60

Confidential

## Introduction

Chronic conditions are the most common problems in health care and the leading causes of death globally [1]. Acute communicable diseases have given way to chronic conditions such as arthritis, diabetes, cardiovascular and respiratory diseases which will impose an even greater burden on the future [2]. The needs of these patients are usually complex and require difficult management. For this reason, many chronic disease prevention and management (CDPM) programs have been designed with the aim of improving outcomes in these patients. CDPM programs targeting diabetes [3-7], asthma [8, 9], heart diseases [10-12], depression [13-15], chronic obstructive lung disease (COPD) [16, 17], obesity [18, 19], kidney disease [20], dyslipidemia [21], hypertension [22], and chronic pain [23] have shown to be effective in improving outcomes such as hospital admissions, costs, adherence to medication, disease control, use of health services, quality of life and mortality. These studies have been based in different settings and were based on single diseases.

Interventions oriented around single diseases take little account of the multiple morbidities experienced by the majority of patients in primary care. To date, the appropriateness of using multidisciplinary professionals in the context of CDPM programs addressing several conditions has been little studied, and the few studies reported mixed but promising results [24-26].

This study introduces a pragmatic innovation involving adapting and integrating CDPM services for multiple diseases into primary care settings and proposes an innovative combination of strategies to evaluate the effects and implementation of this intervention in primary care practices. We wanted to test whether it was possible to implement an

1  
2  
3 intervention integrating multiple-disease oriented CDPM services into primary care  
4  
5 settings. We hypothesized that patients receiving the intervention will report better self-  
6  
7 management, empowerment and self-efficacy and will demonstrate reduced health risk  
8  
9 behaviour. (ClinicalTrials.gov Identifier: NCT01319656) [27].  
10  
11  
12  
13  
14  
15  
16  
17  
18  
19

## 20 **Methods**

### 21 *Settings and subjects*

22  
23 The study took place in eight primary care practices in the Saguenay region of Quebec,  
24  
25 Canada. Patients were referred to the research team by their primary care providers to  
26  
27 assess eligibility, obtain informed consent and receive the intervention. Patients had to be  
28  
29 between 18 and 75 years of age and present at least one of the following chronic  
30  
31 conditions or risk factors: diabetes, cardiovascular disease, COPD, asthma, tobacco  
32  
33 smoking, obesity, hyperlipidemia, carbohydrate intolerance, sedentariness or any  
34  
35 combination.  
36  
37  
38  
39  
40  
41  
42  
43

### 44 *Intervention*

45  
46 Detailed information on the intervention is provided elsewhere [27]; we provide here  
47  
48 only a short description of the main elements. The principles guiding the intervention  
49  
50 were based on the following: self-management support and health education, a patient-  
51  
52 centred approach, motivational approach and inter-professional collaboration. For each  
53  
54 patient, the intervention started with a preliminary clinical evaluation by a trained nurse.  
55  
56  
57  
58  
59  
60

1  
2  
3 The nurse then designed an individualized intervention plan in collaboration with the  
4 patient that could include encounters with one or more CDPM professionals in the  
5 following disciplines: nursing, physical activity therapy, nutrition, respiratory therapy,  
6 and smoking cessation therapy. The intervention plan was rooted in the patient's  
7 objectives as identified at the first encounter but could be further adapted by any  
8 professional in each discipline involved, and could make use of the patient caregiver's  
9 perspective. Each intervention was supported by printed information and other  
10 educational material to help maintain patient engagement between visits. Intervention at  
11 the patient level: (a) was individualized and educational in nature; (b) was given over a  
12 three month period at the most, and (c) consisted of at least three individual encounters  
13 with trained CDPM professionals.  
14  
15  
16  
17  
18  
19  
20  
21  
22  
23  
24  
25  
26  
27  
28  
29  
30  
31

### 32 ***Study design***

33  
34 The effectiveness of this pragmatic intervention was assessed through a combination of  
35 three experimental designs.  
36  
37

38 *Pragmatic Randomized Trial.* Participants completed an initial set of questionnaires at  
39 baseline and socio-demographic data. Patients were then randomized to receive an  
40 immediate (Experimental Group A) or delayed intervention (Control Group B). To  
41 prevent selection bias, a rigorous randomization methodology process with allocation  
42 concealment was followed. Blinding was not achievable, as both patients and health care  
43 providers knew who was involved in each group.  
44  
45  
46  
47  
48  
49  
50  
51

52 Three months after baseline patients in both groups completed the second evaluation.  
53  
54  
55  
56  
57  
58  
59  
60

1  
2  
3 *Before-and-after design.* To document the effectiveness of the intervention at one year,  
4 patients in Group A were reassessed a third time, one year after baseline using the same  
5 measurement tools.  
6  
7

8  
9  
10 *Quasi-experimental design.* Finally, a quasi-experimental design with a comparative  
11 cohort was also used to evaluate one year effectiveness. All patients who received the  
12 intervention (Groups A and B) were included in this analysis. The control group (Group  
13 C) was from the PRECISE research program platform ([www.programmeprecise.ca](http://www.programmeprecise.ca)) [28].  
14  
15 The PRECISE program recruited a cohort of adults aged 25 to 75 years, from the  
16 geographic boundaries of four regions of the Quebec province (Canada). Patients from  
17 this observational cohort (2,198 subjects) were pair-matched with all patients in the  
18 present study (Groups A and B) by age ( $\pm 5$  years), sex, number of chronic diseases, main  
19 diagnosis, and other diagnoses when possible. Groups were compared on the basis of  
20 changes over one year.  
21  
22  
23  
24  
25  
26  
27  
28  
29  
30  
31  
32  
33  
34  
35  
36  
37

### 38 ***Variables and outcome measures***

39 At baseline, we collected participant's socio-demographic data including gender, age,  
40 education, income, marital status, and occupation. We also measured the illness burden  
41 using the Disease Burden Morbidity Assessment (DBMA) tool [29, 30].  
42  
43  
44

45 The main outcome, self-management, was evaluated via the Health Education Impact  
46 Questionnaire (heiQ) [31, 32] which provides a broad profile of the potential impacts of  
47 patient education interventions and is specifically designed to be applied across a large  
48 range of chronic conditions. The heiQ measures eight different domains related to self-  
49 management. Each domain is standardized to range from 1 to 4, and baseline and follow-  
50  
51  
52  
53  
54  
55  
56  
57  
58  
59  
60

1  
2  
3 up data was compared to determine the achievement of meaningful changes in each  
4 domain (see Data analysis). The heiQ has high construct validity and very good reliability  
5 [32]. The development and validation of the heiQ, including the French version, is  
6 described elsewhere [32, 33].  
7

8  
9  
10  
11  
12  
13 Secondary outcomes used to assess the effectiveness of the intervention were: self-  
14 efficacy, health related quality of life, psychological distress, and lifestyle factors. *Self-*  
15 *efficacy* was evaluated using the 6-item questionnaire Self-Efficacy for Managing  
16  
17  
18  
19  
20  
21  
22  
23  
24  
25  
26  
27  
28  
29  
30  
31  
32  
33  
34  
35  
36  
37  
38  
39  
40  
41  
42  
43  
44  
45  
46  
47  
48  
49  
50  
51  
52  
53  
54  
55  
56  
57  
58  
59  
60

Chronic Disease (SEM-CD) [34, 35].  
Health related quality of life (HRQoL) was measured using the SF-12 version 2 [36]. The  
measurement includes the components of physical functioning and mental health. We  
also calculated a preference-based single index of quality of life called SF-6D by  
applying a scoring method that contains six dimensions of the SF-12 [37]. Higher values  
indicate better health status in all measures of HRQoL.

*Psychological distress* was assessed using the Kessler psychological distress scale K-6  
[38, 39]. Scores can range from 0 to 24; scores of 13 or higher were considered as  
presence of psychological distress. Finally, we used three self-reported lifestyle  
indicators: fruit and vegetable consumption, physical activity, and body mass index  
(BMI) derived from self-reported weight and height. The criteria for classifying  
participants as achieving recommended behavioural targets were the following: 1)  
consumption of five portions or more of fruit and vegetable daily (1 portion = 4 ounces or  
125 ml); 2) being physically active (20-30 min. of exercise 4 times per week); and 3)  
normal BMI (18.5 – 24.9 Kg/m<sup>2</sup>) [40]. All the above outcomes were measured at  
baseline, after three months, and after one year via self-reporting.



### *Sample size and statistical power*

The required sample size of 326 participants for the randomized clinical trial was calculated for the main outcome (the percentage of patients improving on the heiQ) with a two-sided  $\alpha = 0.05$  and 80% power and accounting for a drop-out rate of 15%.

### *Data analysis*

*Randomized trial.* To evaluate meaningful individual changes in the heiQ domains, we used the 'classical reliable change index' with a cut-off of  $>1.65$  [41]. For each of the eight domains of the heiQ, we compared the percentages of subjects with a reliable improvement in each group (A vs. B) using the relative risk (RR) with a 95% confidence interval (95% CI). This primary analysis was performed in intention-to-treat.

To evaluate intervention effects on quantitative outcome, we compared group A and B scores after three months with an analysis of covariance (ANCOVA) adjusted for baseline scores [42]. Cohen's  $d$  was the effect size used to indicate the standardised difference between two means. For dichotomous outcomes, we compared Groups A and B using a logistic regression analysis adjusted for baseline. Since there were only a few missing outcomes after three months (less than 5%), we undertook a "complete case" analysis [43].

*Before-and-after design.* To test the effectiveness of the intervention within Group A over a year, we used paired t-test for the continuous variables and McNemar's test for categorical variables.

1  
2  
3 *Quasi-experimental design.* Finally, for comparisons with Group C over a year, we used  
4 ANCOVA or logistic regression adjusting for scores at baseline, age and sex.  
5  
6

7  
8 All data were analysed using the statistical package IBM SPSS Statistics 20. In all  
9  
10 statistical tests, we tested for significance at the 5% level. Cohen's d effect size [44] was  
11  
12 calculated with Microsoft Office Excel 2007 using the pooled standard deviation for the  
13  
14 samples in the calculation.  
15

16  
17 The study received approval from the Research Ethics Board of the *Centre de Santé et de*  
18  
19 *Services Sociaux de Chicoutimi.*  
20  
21

## 22 23 24 25 26 27 **Results**

28  
29 Figure 1 shows the flow chart diagram for the three different experimental designs below.  
30

31  
32 Table 1 shows the baseline demographics and clinical characteristics of participants for  
33  
34 each group.  
35

### 36 *Randomized trial*

37  
38 The recruitment and follow-up periods started in November 2011 and ended in July 2012.  
39

40  
41 A total of 481 eligible patients were referred by primary care providers; 144 patients  
42  
43 received the intervention but refused to participate in the research. Five patients of the  
44  
45 337 who initially agreed to participate declined before completing the baseline  
46  
47 questionnaires. The remaining 332 patients were randomized as follows: 166 in Group A  
48  
49 (intervention group), and 166 in Group B (control group). Nine patients from Group A  
50  
51 and five patients from Group B were lost to follow-up after three months. Therefore, 157  
52  
53  
54  
55  
56  
57  
58  
59  
60

1  
2  
3 patients of Group A and 161 patients of Group B underwent the evaluation after three  
4  
5 months.  
6

7  
8 HeiQ scores in Groups A and B at baseline and after three months are shown in Table 2.  
9

10 Mean absolute values after three months were significantly different from baseline in six  
11  
12 of the eight domains of heiQ: health directed behaviour, emotional well-being, self-  
13  
14 monitoring and insight, constructive attitudes and approaches, skill and technique  
15  
16 acquisition, and health service navigation. The relative risk (RR) of a reliable  
17  
18 improvement from baseline to three months in Group A compared to B for each domain  
19  
20 of self-management is shown in Figure 2. Point estimates vary from 1.15 to 2.4 and the  
21  
22 lower boundary of the 95% CI is higher than one in the same six domains of heiQ in  
23  
24 which mean absolute values were different from baseline after three months.  
25  
26  
27

28  
29 With regard to other continuous variables (Table 3), differences in mean scores between  
30  
31 Groups A and B were statistically significant for two HRQoL variables, the Physical  
32  
33 Component Summary (PCS) and the single index of SF-12 (SF-6D). Results of the  
34  
35 logistic regression analysis for the presence of psychological distress, recommended  
36  
37 consumption of fruit and vegetables and recommended physical activity, are shown in  
38  
39 Table 4. Odds ratios were significantly higher for Group A in fruit and vegetable  
40  
41 consumption and physical activity.  
42  
43  
44  
45

#### 46 47 48 *Before-and-after design* 49

50 A summary including the results for all variables of the before-and-after design in  
51  
52 participants of Group A is shown in Table 5. The analysis included only those subjects  
53  
54 with data at baseline, after three months, and after a year. After three months, changes in  
55  
56  
57  
58  
59  
60

1  
2  
3 all domains of the heiQ were significantly different from baseline, with an effect size  
4 ranging from small to medium (between 0.20 and 0.52). After a year, changes continued  
5  
6 to be significantly different from baseline with the exception of the Health service  
7  
8 navigation domain. Figure 3 shows the changes in each domain of the heiQ over a year.  
9  
10 The percentage of patients in Group A who improved in different domains was between  
11  
12 16% (23/143) and 36% (50/140).  
13  
14  
15  
16  
17  
18  
19

### 20 *Quasi-experimental design*

21  
22 The 332 subjects in the present study were matched with the 332 subjects of the  
23  
24 PRECISE (Group C) study by age, sex, number of chronic diseases, main diagnosis, and  
25  
26 other diagnoses when possible. Demographic and clinical characteristics of Group C and  
27  
28 PRIMAC participants at baseline are shown in Table 1. Table 6 shows the results over a  
29  
30 year, with significant differences in the PCS and BMI, favouring the intervention.  
31  
32  
33  
34  
35  
36  
37  
38

### 39 **Interpretation**

40  
41 Many CDPM programs using interdisciplinary teamwork have been described, but the  
42  
43 vast majority have been focused on single diseases, and only a few have considered more  
44  
45 than one disease. In the intervention that is object of this study, we adapted and  
46  
47 implemented the integration of disease prevention and management services into primary  
48  
49 health care for four chronic conditions and their risk factors. After three months, the  
50  
51 intervention showed some benefit in six out of the eight domains of self-management  
52  
53 measured by the heiQ, both in terms of absolute mean values and relative risk analysis, as  
54  
55 compared with the control group. However, percentage of patients in Group A who  
56  
57  
58  
59  
60

1  
2  
3 improved in different domains (Figure 3) was between 16% (23/143) and 36% (50/140),  
4  
5 i.e. they were not the majority in any domain. Our interpretation of this is that there is  
6  
7 still room for improvement and making the intervention more effective. Recently,  
8  
9 Coventry and colleagues [45] published the results of a cluster randomised controlled  
10  
11 trial for patients with depression and comorbid diabetes or cardiovascular disease in  
12  
13 which the heiQ was used as a secondary outcome. As occurred in our study, Coventry  
14  
15 and colleagues did not observe significant improvement in the domains “Positive and  
16  
17 active engagement in life” and “Social integration and support”.  
18  
19

20  
21 The evaluation of secondary outcomes in our study also showed modest but beneficial  
22  
23 effects of the intervention in fruit and vegetable consumption, physical activity, and the  
24  
25 physical component of quality of life. After one year, improvements were still present, in  
26  
27 general. BMI showed a modest but significant improvement after one year. Psychological  
28  
29 distress did not change. This lack of change could reflect either that the length of the  
30  
31 interventions was too short or that the elements behind this situation were not among  
32  
33 those targeted by the intervention. The prevalence of recommended physical activity  
34  
35 significantly improved at three months but then decreased over a year to a level  
36  
37 equivalent to baseline. This may indicate a need to reinforce the message at follow-up.  
38  
39

40  
41 According to a recent systematic review, interventions to promote physical activity lead  
42  
43 to improvements in physical activity at 12 months. Longer sustainability is unclear [46].  
44  
45

46  
47 The Self-efficacy for Managing Chronic Disease score showed no significant difference  
48  
49 between experimental and control groups. A closer look at the results of this variable  
50  
51 showed that mean values were rather high at baseline in both groups with little room for  
52  
53 improvement. The statistically significant improvement observed in the physical  
54  
55  
56  
57  
58  
59  
60

1  
2  
3 component of quality of life of the experimental group was barely clinically important  
4  
5 [47].  
6  
7

8 We are aware of only a few studies of multidisciplinary specialized professionals in the  
9  
10 context of primary care practices. These studies were conducted in the context of single  
11  
12 conditions including COPD and asthma [16, 48], metabolic syndrome [49], kidney failure  
13  
14 [20], diabetes [50], blood pressure control [51], or people with risk factors [52].  
15  
16

17 Interventions were based on different approaches, mainly self-management support and  
18  
19 patient education. The outcomes used varied greatly from one study to another and  
20  
21 included the use of healthcare services, quality of life, various physiological indicators  
22  
23 and risk factor modification. All studies reported positive results in their respective  
24  
25 outcomes. We did not find any study in which interventions addressed more than one  
26  
27 concurrent chronic condition, which is a situation frequently present in primary care [53,  
28  
29 54].  
30  
31  
32  
33  
34  
35  
36  
37

### 38 *Implications for practice*

39 This study demonstrated that it is possible to implement an intervention integrating  
40  
41 chronic disease prevention and management services for several chronic conditions into  
42  
43 primary care settings. Despite the short duration of the intervention, it was possible to  
44  
45 observe positive results. Adding a few hours of contact with the patients after a few  
46  
47 months from the initial intervention could potentially boost the positive effects for a  
48  
49 longer period of time. As commonly observed in primary care, the majority of patients  
50  
51 participating in the study had multimorbidity. This population could be specifically  
52  
53 targeted in further studies. The intervention consolidated the central role of primary  
54  
55  
56  
57  
58  
59  
60

1  
2  
3 health care professionals and their organization, while maintaining the natural proximity  
4 between the patient and their primary care clinic. In this regard, interventions: (a) were  
5 carried out upon referral from the primary care team; (b) allowed an exchange with the  
6 primary care team and were included in primary care medical records; (c) returned the  
7 responsibility of long-term follow-up to the primary care team. We think that it is  
8 appropriate to test the intervention in different care organizations.  
9  
10  
11  
12  
13  
14  
15  
16  
17  
18  
19

### 20 *Limits and strengths*

21  
22 Generalisability may be limited given the study eligibility based on selected conditions  
23 (type II diabetes, cardiovascular disease, COPD or asthma), or risk factors (smoking,  
24 obesity, hyperlipidemia, carbohydrate intolerance, and metabolic syndrome). However  
25 these patients are the norm in primary care.  
26  
27  
28  
29  
30

31 Building an intervention using multiple CDPM professionals poses a challenge. There  
32 could have been some variation in the way these professionals provided the services  
33 despite the fact that they had similar training before starting the intervention.  
34  
35  
36  
37

38 The use of patient self-reported questionnaires for outcomes is also an issue. This method  
39 may have introduced some desirability bias but it is coherent with the use of a patient-  
40 centered approach. Finally, 30% percent of the patients referred by primary care  
41 providers to the research team declined participation in the research. The impact of this  
42 on the composition of the sample of participants is not known.  
43  
44  
45  
46  
47  
48  
49

50 A strength of this study is that the pragmatic trial was conducted with patients as they  
51 present in the real world: all eligible patients were included and no patient was refused  
52 because of their disease burden or comorbidities like you would expect in most clinical  
53  
54  
55  
56  
57  
58  
59  
60

1  
2  
3 trials. Positive results in this context are highly significant. The use of a triple  
4  
5 experimental design also allowed us to measure the outcomes from different lenses up to  
6  
7 one year after the intervention, and to better adapt to the context of practice-based  
8  
9 research.  
10  
11

### 12 13 14 15 *Conclusion*

16  
17 The evaluation of an innovative intervention for adapting and integrating chronic disease  
18  
19 prevention and management services, which addressed more than one disease or risk  
20  
21 factor into primary care settings yielded positive and promising results. This type of  
22  
23 intervention can surely be improved, and its introduction in the routine of primary care  
24  
25 practice would help to achieve the primary care goal of high quality care for patients with  
26  
27 chronic diseases.  
28  
29  
30  
31  
32  
33  
34  
35  
36  
37  
38  
39  
40  
41  
42  
43  
44  
45  
46  
47  
48  
49  
50  
51  
52  
53  
54  
55  
56  
57  
58  
59  
60



### Authors' contributions

M Fortin, MC Chouinard, MF Dubois and M Bélanger identified the need for this study and contributed to its conception and design. J Almirall and T Bouhali conducted the analysis of data under the supervision and guidance of MF Dubois and M Fortin. MC Chouinard, M Bélanger and M Sasseville also contributed to the analysis and interpretation of data. All authors contributed to the first draft and had full access to all of the data (including statistical reports and tables) in the study and can take responsibility for the integrity of the data and the accuracy of the data analysis. All authors contributed to the writing and gave the final approval of the version submitted. M. Fortin takes responsibility for the integrity of the work as a whole.

### Competing interests

All authors declare that they have no competing interests.

### Other information

*Trial Registration:* ClinicalTrials.gov Identifier: NCT01319656

(<http://www.clinicaltrials.gov/ct2/show/NCT01319656?term=prlmac&rank=1>)

*Protocol:* Fortin M, Chouinard MC, Bouhali T, Dubois MF, Gagnon C, Belanger M.

Evaluating the integration of chronic disease prevention and management services into primary health care. *BMC Health Serv Res.* 2013;13(1):132.

1  
2  
3  
4 *Sponsors and collaborators:* Fonds Pfizer-Fonds de la Recherche du Québec en santé  
5  
6 (FRQS)-Ministère de la Santé et des Services Sociaux Maladies Chroniques, Centre  
7  
8 intégré universitaire de santé et de services sociaux du Saguenay–Lac-Saint-Jean,  
9  
10 Université du Québec à Chicoutimi. The FRQS peer reviewed the protocol and manages  
11  
12 the funding. None of the funding entities had any role in preparing, reviewing or  
13  
14 approving the manuscript  
15

16  
17  
18 Dr. Martin Fortin holds the Research Chair on Chronic Diseases in Primary Care.  
19

## 20 21 22 **Acknowledgements**

23  
24 The authors gratefully acknowledge the contribution of all participants including patients,  
25  
26 their family members, health care services' managers, and professionals. We would also  
27  
28 like to acknowledge the extended research team members for their contribution in the  
29  
30 conception and the conduction of the study. We would like to thank the clinical team  
31  
32 members and the eight participating clinics for their help and advice with our research  
33  
34 project. Furthermore we want to thank the members of the “Trajectoire des services de  
35  
36 services de réadaptation intégrés pour les maladies chroniques” and all professionals of  
37  
38 specialized healthcare services of Centre intégré universitaire de santé et de services  
39  
40 sociaux du Saguenay–Lac-Saint-Jean for their help and advice in the development of the  
41  
42 clinical interventions. This study is made possible by the dedication of employees of the  
43  
44 Research on Chronic Diseases in Primary Care. This work was supported by the Research  
45  
46 Chair on Chronic Diseases in Primary Care funded by “La fondation de ma vie” and  
47  
48 Université de Sherbrooke.  
49  
50  
51  
52  
53  
54  
55  
56  
57  
58  
59  
60

## References

1. World Health Organisation. Global status report on noncommunicable diseases 2010. 2011; Available: [http://www.who.int/nmh/publications/ncd\\_report\\_full\\_en.pdf](http://www.who.int/nmh/publications/ncd_report_full_en.pdf). (accessed 18 August 2015).
2. Mathers CD and Loncar D. Projections of global mortality and burden of disease from 2002 to 2030. *PLoS Med* 2006;3:e442.
3. Tan WS, Ding YY, Xia WC, et al. Effects of a population-based diabetes management program in Singapore. *Am J Manag Care* 2014;20:e388-98.
4. Johnson C, Ruisinger JF, Bates J, et al. Impact of a community-based diabetes self-management program on key metabolic parameters. *Pharm Pract (Granada)* 2014;12:499.
5. Samaan MC, Valencia M, Cheung C, et al. Design, implementation, and evaluation of a pediatric and adolescent type 2 diabetes management program at a tertiary pediatric center. *J Multidiscip Healthc* 2014;7:321-31.
6. Jameson JP and Baty PJ. Pharmacist collaborative management of poorly controlled diabetes mellitus: a randomized controlled trial. *Am J Manag Care* 2010;16:250-5.
7. Tang PC, Overhage JM, Chan AS, et al. Online disease management of diabetes: engaging and motivating patients online with enhanced resources-diabetes (EMPOWER-D), a randomized controlled trial. *J Am Med Inform Assoc* 2013;20:526-34.

- 1  
2  
3 8. Jain VV, Allison R, Beck SJ, et al. Impact of an integrated disease management  
4 program in reducing exacerbations in patients with severe asthma and COPD.  
5  
6 *Respir Med* 2014;108:1794-800.  
7
- 8  
9  
10 9. Rasberry CN, Cheung K, Buckley R, et al. Indicators of asthma control among  
11 students in a rural, school-based asthma management program. *J Asthma*  
12  
13 2014;51:876-85.  
14
- 15  
16  
17 10. Hamar GB, Rula EY, Coberley C, et al. Long-term impact of a chronic disease  
18 management program on hospital utilization and cost in an Australian population  
19 with heart disease or diabetes. *BMC Health Serv Res* 2015;15:174.  
20  
21
- 22 11. Hendricks V, Schmidt S, Vogt A, et al. Case management program for patients  
23 with chronic heart failure: effectiveness in terms of mortality, hospital admissions  
24 and costs. *Dtsch Arztebl Int* 2014;111:264-70.  
25  
26
- 27 12. Housholder-Hughes SD, Ranella MJ, Dele-Michael A, et al. Evaluation of a  
28 postdischarge coronary artery disease management program. *J Am Assoc Nurse*  
29 *Pract* 2015;27:371-8.  
30  
31
- 32 13. Ryan JG, Buford U, Arias E, et al. Participation in and impact of a depression  
33 care management program targeting low-income minority patients in an urban  
34 community-based clinic. *Clin Ther* 2014;36:778-90.  
35  
36
- 37 14. Berghofer A, Hartwich A, Bauer M, et al. Efficacy of a systematic depression  
38 management program in high utilizers of primary care: a randomized trial. *BMC*  
39 *Health Serv Res* 2012;12:298.  
40  
41
- 42 15. Simon GE, Ralston JD, Savarino J, et al. Randomized trial of depression follow-  
43 up care by online messaging. *J Gen Intern Med* 2011;26:698-704.  
44  
45  
46  
47  
48  
49  
50  
51  
52  
53  
54  
55  
56  
57  
58  
59  
60

- 1  
2  
3  
4  
5  
6  
7  
8  
9  
10  
11  
12  
13  
14  
15  
16  
17  
18  
19  
20  
21  
22  
23  
24  
25  
26  
27  
28  
29  
30  
31  
32  
33  
34  
35  
36  
37  
38  
39  
40  
41  
42  
43  
44  
45  
46  
47  
48  
49  
50  
51  
52  
53  
54  
55  
56  
57  
58  
59  
60
16. Lou P, Chen P, Zhang P, et al. A COPD health management program in a community-based primary care setting: a randomized controlled trial. *Respir Care* 2015;60:102-12.
  17. Fan VS, Gaziano JM, Lew R, et al. A comprehensive care management program to prevent chronic obstructive pulmonary disease hospitalizations: a randomized, controlled trial. *Ann Intern Med* 2012;156:673-83.
  18. Kruschitz R, Wallner-Liebmann SJ, Lothaller H, et al. Evaluation of a meal replacement-based weight management program in primary care settings according to the actual European Clinical Practice Guidelines for the Management of Obesity in Adults. *Wien Klin Wochenschr* 2014;126:598-603.
  19. Dalton WT, 3rd, Schetzina KE, McBee MT, et al. Parent report of child's health-related quality of life after a primary-care-based weight management program. *Child Obes* 2013;9:501-8.
  20. Bayliss EA, Bhardwaja B, Ross C, et al. Multidisciplinary team care may slow the rate of decline in renal function. *Clin J Am Soc Nephrol* 2011;6:704-10.
  21. Villeneuve J, Genest J, Blais L, et al. A cluster randomized controlled Trial to Evaluate an Ambulatory primary care Management program for patients with dyslipidemia: the TEAM study. *CMAJ* 2010;182:447-55.
  22. Bex SD, Boldt AS, Needham SB, et al. Effectiveness of a hypertension care management program provided by clinical pharmacists for veterans. *Pharmacotherapy* 2011;31:31-8.

- 1  
2  
3  
4  
5  
6  
7  
8  
9  
10  
11  
12  
13  
14  
15  
16  
17  
18  
19  
20  
21  
22  
23  
24  
25  
26  
27  
28  
29  
30  
31  
32  
33  
34  
35  
36  
37  
38  
39  
40  
41  
42  
43  
44  
45  
46  
47  
48  
49  
50  
51  
52  
53  
54  
55  
56  
57  
58  
59  
60
23. Nevedal DC, Wang C, Oberleitner L, et al. Effects of an individually tailored Web-based chronic pain management program on pain severity, psychological health, and functioning. *J Med Internet Res* 2013;15:e201.
24. Katon W, Russo J, Lin EH, et al. Cost-effectiveness of a multicondition collaborative care intervention: a randomized controlled trial. *Arch Gen Psychiatry* 2012;69:506-14.
25. Lin EH, Von Korff M, Peterson D, et al. Population targeting and durability of multimorbidity collaborative care management. *Am J Manag Care* 2014;20:887-95.
26. Morrin L, Britten J, Davachi S, et al. Alberta Healthy Living Program--a model for successful integration of chronic disease management services. *Can J Diabetes* 2013;37:254-9.
27. Fortin M, Chouinard MC, Bouhali T, et al. Evaluating the integration of chronic disease prevention and management services into primary health care. *BMC Health Services Research* 2013;13:132.
28. Haggerty J, Fortin M, Beaulieu M-D, et al. At the interface of community and healthcare systems: a longitudinal cohort study on evolving health and the impact of primary healthcare from the patient's perspective. *BMC Health Services Research* 2010;10:258.
29. Bayliss EA, Ellis JL, and Steiner JF. Subjective assessments of comorbidity correlate with quality of life health outcomes: Initial validation of a comorbidity assessment instrument. *Health and Quality of life Outcomes* 2005;3:51.

- 1  
2  
3  
4  
5  
6  
7  
8  
9  
10  
11  
12  
13  
14  
15  
16  
17  
18  
19  
20  
21  
22  
23  
24  
25  
26  
27  
28  
29  
30  
31  
32  
33  
34  
35  
36  
37  
38  
39  
40  
41  
42  
43  
44  
45  
46  
47  
48  
49  
50  
51  
52  
53  
54  
55  
56  
57  
58  
59  
60
30. Poitras M-E, Fortin M, Hudon C, et al. Validation of the disease burden morbidity assessment by self-report in a French-speaking population. *BMC Health Service Research* 2012;12:35.
  31. Nolte S, Elsworth GR, Sinclair AJ, et al. The extent and breadth of benefits from participating in chronic disease self-management courses: a national patient-reported outcomes survey. *Patient Education & Counseling* 2007;65:351-60.
  32. Osborne RH, Elsworth GR, and Whitfield K. The Health Education Impact Questionnaire (heiQ): an outcomes and evaluation measure for patient education and self-management interventions for people with chronic conditions. *Patient Education & Counseling* 2007;66:192-201.
  33. Bélanger A, Hudon C, Fortin M, et al. Validation of a French-language version of the health education impact Questionnaire (heiQ) among chronic disease patients seen in primary care: a cross-sectional study. *Health Qual Life Outcomes* 2015;13:64.
  34. Sherer M, Maddux JE, Mercandante B, et al. The self-efficacy scale: Construction and validation. *Psychological Reports* 1982;51:663-671.
  35. Stanford Patient Education Research Center. Self-Efficacy for Managing Chronic Disease 6-Item Scale. Available: <http://patienteducation.stanford.edu/research/secd6.html>. (accessed 25 juillet 2013).
  36. Ware J, Kosinski M, and Keller SD. A 12-item short-form health survey: Construction of scales and preliminary steps of reliability and validity. *Med Care* 1996;34:220-233.

- 1  
2  
3 37. Brazier JE and Roberts J. The estimation of a preference-based measure of health  
4 from the SF-12. *Med Care* 2004;42:851-9.  
5  
6  
7  
8 38. Kessler RC, Barker PR, Colpe LJ, et al. Screening for serious mental illness in the  
9 general population. *Archives of General Psychiatry*. 2003;60:184-189.  
10  
11  
12 39. Safran MA, Strine TW, Dhingra SS, et al. Psychological distress and mental  
13 health treatment among persons with and without active duty military experience,  
14 Behavioral Risk Factor Surveillance System, United States, 2007. *Int J Public*  
15 *Health* 2009;54 (Suppl 1):61-7.  
16  
17  
18  
19  
20  
21  
22 40. Santé et services sociaux Québec. Indice de masse corporelle, selon le sexe. 2011;  
23 Available: [http://www.msss.gouv.qc.ca/statistiques/sante-bien-](http://www.msss.gouv.qc.ca/statistiques/sante-bien-etre/index.php?Indice-de-masse-corporelle-selon-le-sexe)  
24 [etre/index.php?Indice-de-masse-corporelle-selon-le-sexe](http://www.msss.gouv.qc.ca/statistiques/sante-bien-etre/index.php?Indice-de-masse-corporelle-selon-le-sexe). (accessed 18 August  
25 2015).  
26  
27  
28  
29  
30  
31  
32 41. Maassen GH. The standard error in the Jacobson and Truax Reliable Change  
33 Index: the classical approach to the assessment of reliable change. *J Int*  
34 *Neuropsychol Soc* 2004;10:888-93.  
35  
36  
37  
38  
39 42. Van Breukelen GJ. ANCOVA versus change from baseline: more power in  
40 randomized studies, more bias in nonrandomized studies [corrected]. *J Clin*  
41 *Epidemiol* 2006;59:920-5.  
42  
43  
44  
45  
46 43. Moher D, Hopewell S, Schulz KF, et al. CONSORT 2010 Explanation and  
47 Elaboration: Updated guidelines for reporting parallel group randomised trials. *J*  
48 *Clin Epidemiol* 2010;63:e1-37.  
49  
50  
51  
52  
53 44. Sullivan GM and Feinn R. Using Effect Size-or Why the P Value Is Not Enough.  
54 *J Grad Med Educ* 2012;4:279-82.  
55  
56  
57  
58  
59  
60



- 1  
2  
3  
4  
5  
6  
7  
8  
9  
10  
11  
12  
13  
14  
15  
16  
17  
18  
19  
20  
21  
22  
23  
24  
25  
26  
27  
28  
29  
30  
31  
32  
33  
34  
35  
36  
37  
38  
39  
40  
41  
42  
43  
44  
45  
46  
47  
48  
49  
50  
51  
52  
53  
54  
55  
56  
57  
58  
59  
60
45. Coventry P, Lovell K, Dickens C, et al. Integrated primary care for patients with mental and physical multimorbidity: cluster randomised controlled trial of collaborative care for patients with depression comorbid with diabetes or cardiovascular disease. *BMJ* 2015;350:h638.
  46. Hobbs N, Godfrey A, Lara J, et al. Are behavioral interventions effective in increasing physical activity at 12 to 36 months in adults aged 55 to 70 years? A systematic review and meta-analysis. *BMC Med* 2013;11:75.
  47. Samsa G, Edelman D, Rothman ML, et al. Determining clinically important differences in health status measures: a general approach with illustration to the Health Utilities Index Mark II. *Pharmacoeconomics* 1999;15:141-55.
  48. Hart MK and Millard MW. Approaches to chronic disease management for asthma and chronic obstructive pulmonary disease: strategies through the continuum of care. *Proc (Bayl Univ Med Cent)* 2010;23:223-9.
  49. Blonstein AC, Yank V, Stafford RS, et al. Translating an evidence-based lifestyle intervention program into primary care: lessons learned. *Health Promot Pract* 2013;14:491-7.
  50. Huang MC, Hsu CC, Wang HS, et al. Prospective randomized controlled trial to evaluate effectiveness of registered dietitian-led diabetes management on glycemic and diet control in a primary care setting in Taiwan. *Diabetes Care* 2010;33:233-9.
  51. Sillah A, Sidebottom AC, Boucher JL, et al. Program participation and blood pressure improvement in the Heart of New Ulm Project, Minnesota, 2009-2011. *Prev Chronic Dis* 2014;11:E48.

1  
2  
3  
4  
5  
6  
7  
8  
9  
10  
11  
12  
13  
14  
15  
16  
17  
18  
19  
20  
21  
22  
23  
24  
25  
26  
27  
28  
29  
30  
31  
32  
33  
34  
35  
36  
37  
38  
39  
40  
41  
42  
43  
44  
45  
46  
47  
48  
49  
50  
51  
52  
53  
54  
55  
56  
57  
58  
59  
60

- 52. Eriksson KM, Westborg CJ, and Eliasson MC. A randomized trial of lifestyle intervention in primary healthcare for the modification of cardiovascular risk factors. *Scand J Public Health* 2006;34:453-61.
- 53. Fortin M, Bravo G, Hudon C, et al. Prevalence of multimorbidity among adults seen in family practice. *Ann Fam Med* 2005;3:223-228.
- 54. Fortin M, Stewart M, Poitras ME, et al. A systematic review of prevalence studies on multimorbidity: toward a more uniform methodology. *Ann Fam Med* 2012;10:142-51.

Confidential

**Table 1.** Demographic and clinical characteristics of participants at baseline.

|                                           | <b>Mean (SD)</b> |             |             |            |
|-------------------------------------------|------------------|-------------|-------------|------------|
|                                           | PR1MAC           | Group A*    | Group B*    | Group C    |
|                                           | n = 332          | n = 157     | n = 161     | n = 332    |
| <b>Age (yr.)</b>                          | 52.5 (11.6)      | 52.8 (11.4) | 52.9 (11.5) | 54.0 (9.9) |
| <b>Number of chronic diseases</b>         | 4.9 (2.4)        | 5.1 (2.6)   | 4.8 (2.2)   | 4.8 (2.5)  |
| <b>Illness burden</b>                     | 10.3 (7.1)       | 11.0 (7.7)  | 9.7 (6.3)   | 9.7 (7.5)  |
|                                           | <b>N (%)</b>     |             |             |            |
| <b>Males</b>                              | 172 (51.8)       | 82 (52.2)   | 81 (50.3)   | 174 (52.4) |
| <b>Multimorbidity (2 conditions or +)</b> | 315 (94.9)       | 151 (96.2)  | 153 (95.0)  | 313 (94.3) |
| <b>Multimorbidity (3 conditions or +)</b> | 281 (84.6)       | 132 (84.1)  | 139 (86.3)  | 271 (81.6) |
| <b>Education level</b>                    |                  |             |             |            |
| Incomplete high school                    | 59 (17.8)        | 20 (12.7)   | 38 (23.6)   | 78 (23.5)  |
| High school diploma                       | 110 (33.1)       | 53 (33.8)   | 50 (31.1)   | 122 (36.7) |
| College                                   | 97 (29.2)        | 47 (29.9)   | 46 (28.6)   | 73 (22.0)  |
| University                                | 64 (19.3)        | 35 (22.3)   | 27 (16.8)   | 58 (17.5)  |
| Missing data                              | 2 (0.6)          | 2 (1.3)     | 0           | 1 (0.3)    |
| <b>Household income in CAD\$</b>          |                  |             |             |            |
| < 20,000\$                                | 41 (12.3)        | 19 (12.1)   | 21 (13.0)   | 50 (15.1)  |
| 20,000\$-49,999\$                         | 123 (37.0)       | 53 (33.8)   | 64 (39.8)   | 132 (39.8) |
| 50,000\$ or +                             | 161 (48.5)       | 81 (51.6)   | 73 (45.3)   | 145 (43.7) |
| Missing data                              | 7 (2.1)          | 4 (2.5)     | 3 (1.9)     | 5 (1.5)    |

**Marital status**

|                    |            |            |            |            |
|--------------------|------------|------------|------------|------------|
| Married            | 245 (73.8) | 109 (69.4) | 127 (78.9) | 219 (66.0) |
| Single or Divorced | 71 (21.4)  | 38 (24.2)  | 28 (17.4)  | 98 (29.6)  |
| Widower            | 16 (4.8)   | 10 (6.4)   | 6 (3.7)    | 15 (4.5)   |

**Employment**

|              |            |           |           |            |
|--------------|------------|-----------|-----------|------------|
| Employed     | 192 (57.8) | 89 (56.7) | 91 (56.5) | 167 (50.3) |
| Unemployed   | 53 (16.0)  | 22 (14.0) | 29 (18.0) | 71 (21.4)  |
| Retired      | 84 (25.3)  | 44 (28.0) | 40 (24.8) | 94 (28.3)  |
| Missing data | 3 (0.9)    | 2 (1.3)   | 1 (0.6)   | 0          |

---

\*Excluding patients lost to follow-up (nine in Group A and five in Group C)

Table 2. Self-management scores in Groups A and B at baseline and after 3 months.\*

| Domain (heiQ)                                   | Group    | Baseline |             | 3 months |             | Group A vs. Group B   |                    | p*    |
|-------------------------------------------------|----------|----------|-------------|----------|-------------|-----------------------|--------------------|-------|
|                                                 |          | n        | Mean (SD)   | n        | Mean (SD)   | Baseline vs. 3 months |                    |       |
|                                                 |          |          |             |          |             | (3 months)            |                    |       |
|                                                 |          |          |             |          |             | Cohen's d (95% CI)    | Cohen's d (95% CI) |       |
| <b>Health directed behaviour</b>                | <b>A</b> | 162      | 2.61 (0.73) | 153      | 2.96 (0.63) | 0.51 (0.44 to 0.59)   |                    | 0.001 |
|                                                 | <b>B</b> | 163      | 2.66 (0.78) | 156      | 2.78 (0.72) | 0.16 (0.08 to 0.24)   |                    |       |
| <b>Positive &amp; active engagement in life</b> | <b>A</b> | 165      | 3.10 (0.54) | 156      | 3.24 (0.51) | 0.27 (0.21 to 0.23)   |                    | 0.319 |
|                                                 | <b>B</b> | 165      | 3.10 (0.54) | 158      | 3.18 (0.50) | 0.15 (0.10 to 0.21)   |                    |       |
| <b>Emotional wellbeing</b>                      | <b>A</b> | 160      | 2.68 (0.64) | 149      | 2.96 (0.60) | 0.45 (0.38 to 0.52)   |                    | 0.012 |
|                                                 | <b>B</b> | 160      | 2.73 (0.63) | 153      | 2.85 (0.56) | 0.20 (0.14 to 0.27)   |                    |       |
| <b>Self monitoring and insight</b>              | <b>A</b> | 159      | 3.03 (0.41) | 149      | 3.23 (0.38) | 0.51 (0.46 to 0.55)   |                    | 0.001 |

1  
2  
3  
4  
5  
6  
7  
8  
9  
10  
11  
12  
13  
14  
15  
16  
17  
18  
19  
20  
21  
22  
23  
24  
25  
26  
27  
28  
29  
30  
31  
32  
33  
34  
35  
36  
37  
38  
39  
40  
41  
42  
43  
44  
45  
46  
47  
48  
49

|                                              |          |     |             |     |             |                        |                     |       |
|----------------------------------------------|----------|-----|-------------|-----|-------------|------------------------|---------------------|-------|
|                                              | <b>B</b> | 160 | 3.01 (0.41) | 154 | 3.07 (0.44) | 0.14 (0.10 to 0.19)    |                     |       |
|                                              | <b>A</b> | 163 | 3.07 (0.48) | 153 | 3.22 (0.47) | 0.32 (0.27 to 0.37)    | 0.11 (0.05 to 0.16) | 0.048 |
| <b>Constructive attitudes and approaches</b> | <b>B</b> | 161 | 3.13 (0.46) | 155 | 3.17 (0.48) | 0.09 (0.03 to 0.14)    |                     |       |
|                                              | <b>A</b> | 163 | 2.83 (0.51) | 153 | 3.09 (0.45) | 0.54 (0.49 to 0.60)    | 0.31 (0.26 to 0.36) | 0.001 |
| <b>Skill and technique acquisition</b>       | <b>B</b> | 161 | 2.86 (0.50) | 156 | 2.95 (0.45) | 0.19 (0.14 to 0.24)    |                     |       |
|                                              | <b>A</b> | 164 | 2.98 (0.53) | 154 | 3.09 (0.54) | 0.21 (0.15 to 0.27)    | 0.19 (0.13 to 0.25) | 0.098 |
| <b>Social integration &amp; support</b>      | <b>B</b> | 161 | 2.95 (0.54) | 156 | 2.99 (0.53) | 0.08 (0.02 to 0.13)    |                     |       |
|                                              | <b>A</b> | 165 | 3.27 (0.41) | 154 | 3.38 (0.42) | 0.27 (0.22 to 0.31)    | 0.35 (0.30 to 0.39) | 0.005 |
| <b>Health service navigation</b>             | <b>B</b> | 166 | 3.26 (0.42) | 160 | 3.23 (0.45) | -0.07 (-0.12 to -0.02) |                     |       |

\* Mean differences for Cohen’s d effect size were calculated as (Mean 3 months - Mean Baseline) and (Mean 3months Group A - Mean 3 months Group B). ANCOVA comparing scores after 3 months, adjusting for baseline.

**Table 3.** Other variables in Groups A and B at baseline and after 3 months.\*

| Variable     | Group | Baseline |               | 3 months |               | Group A vs. Group B<br>(3 months) |                      |       |
|--------------|-------|----------|---------------|----------|---------------|-----------------------------------|----------------------|-------|
|              |       | n        | Mean (S.D.)   | n        | Mean (S.D.)   | Cohen's d (95% CI)                | Cohen's d (95% CI)   | p*    |
| Score SEM-CD | A     | 153      | 7.5 (1.8)     | 152      | 8.0 (1.6)     | 0.30 (0.10 to 0.49)               | 0.18 (-0.01 to 0.37) | 0.195 |
|              | B     | 160      | 7.3 (2.0)     | 158      | 7.7 (1.7)     | 0.22 (0.01 to 0.42)               |                      |       |
| PCS          | A     | 155      | 42.7 (9.7)    | 155      | 45.8 (9.3)    | 0.33 (-0.73 to 1.38)              | 0.04 (-1.03 to 1.11) | 0.017 |
|              | B     | 161      | 44.6 (10.6)   | 160      | 45.4 (10.0)   | 0.08 (-1.05 to 1.20)              |                      |       |
| MCS          | A     | 155      | 46.7 (10.7)   | 155      | 49.8 (9.9)    | 0.30 (-0.83 to 1.44)              | 0.04 (-1.02 to 1.10) | 0.159 |
|              | B     | 161      | 47.9 (10.8)   | 160      | 49.4 (9.4)    | 0.15 (-0.96 to 1.25)              |                      |       |
| SF-6D        | A     | 154      | 0.683 (0.131) | 153      | 0.729 (0.134) | 0.35 (0.33 to 0.36)               | 0.00 (-0.01 to 0.01) | 0.041 |

1  
2  
3  
4  
5  
6  
7  
8  
9  
10  
11  
12  
13  
14  
15  
16  
17  
18  
19  
20  
21  
22  
23  
24  
25  
26  
27  
28  
29  
30  
31  
32  
33  
34  
35  
36  
37  
38  
39  
40  
41  
42  
43  
44  
45  
46  
47  
48  
49

|                               |   |     |               |     |               |                       |                      |       |
|-------------------------------|---|-----|---------------|-----|---------------|-----------------------|----------------------|-------|
|                               | B | 160 | 0.715 (0.129) | 159 | 0.729 (0.126) | 0.11 (0.10 to 0.12)   |                      |       |
| <b>BMI (Kg/m<sup>2</sup>)</b> | A | 152 | 32.0 (7.2)    | 148 | 31.5 (7.4)    | -0.06 (-0.89 to 0.75) | 0.04 (-0.75 to 0.84) | 0.900 |
|                               | B | 155 | 31.2 (7.0)    | 157 | 31.2 (6.8)    | 0.00 (-0.76 to 0.76)  |                      |       |

\*Mean differences for Cohen’s d effect size were calculated as (Mean 3 months - Mean Baseline) and (Mean 3months Group A - Mean 3 months Group B). ANCOVA comparing scores after 3 months, adjusting for baseline.

SEM-CD = Self-Efficacy for Managing Chronic Disease; HRQoL = Health Related Quality of Life; PCS = Physical Component Summary of SF-12; MCS = Mental Component Summary of SF-12; SF-6D = Single index of SF-12; BMI = Body Mass Index.

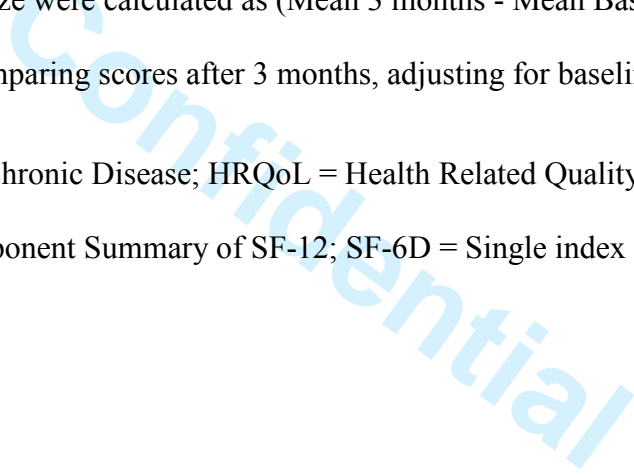



**Table 4.** Results of logistic regression analysis for categorical variables at 3 months adjusted for their baseline values.

| <b>Variable</b>  | <b>Group</b> | <b>Baseline<br/>n (%)</b> | <b>3 months<br/>n (%)</b> | <b>Adjusted<br/>Odds ratio</b> | <b>95% CI*</b> |
|------------------|--------------|---------------------------|---------------------------|--------------------------------|----------------|
| <b>DP</b>        | Group A      | 16 (10.4)                 | 8 (5.2)                   | 0.84                           | 0.29 to 2.45   |
|                  | Group B      | 15 (9.3)                  | 9 (5.7)                   |                                |                |
| <b>F &amp; V</b> | Group A      | 49 (31.6)                 | 83 (55.0)                 | 2.36                           | 1.41 to 3.95   |
|                  | Group B      | 50 (31.1)                 | 61 (38.1)                 |                                |                |
| <b>PA</b>        | Group A      | 15 (9.7)                  | 32 (20.8)                 | 3.81                           | 1.65 to 8.76   |
|                  | Group B      | 22 (13.7)                 | 18 (11.3)                 |                                |                |

\* DP = Presence of psychological distress; F&V = Recommended fruit and vegetable; PA = Recommended physical activity; 95% CI = 95% Confidence Interval.

**Table 5.** Results of the before-and-after design in participants of Group A.\*

| Variable (n)*                                                     | Baseline    | 3 months    | 12 months   | Baseline vs. 3 months |        | Baseline vs. 12 months |        |
|-------------------------------------------------------------------|-------------|-------------|-------------|-----------------------|--------|------------------------|--------|
|                                                                   | Mean (SD)   | Mean (SD)   | Mean (SD)   | Cohen's d (95% CI)    | p      | Cohen's d (95% CI)     | p      |
| <b>Health directed<br/>behaviour (140)</b>                        | 2.62 (0.75) | 2.96 (0.64) | 2.93 (0.64) | 0.49 (0.41 to 0.57)   | <0.001 | 0.45 (0.37 to 0.53)    | <0.001 |
| <b>Positive &amp;<br/>active<br/>engagement in<br/>life (142)</b> | 3.12 (0.53) | 3.25 (0.51) | 3.29 (0.49) | 0.25 (0.19 to 0.31)   | <0.001 | 0.33 (0.28 to 0.39)    | <0.001 |
| <b>Emotional well-<br/>being (138)</b>                            | 2.69 (0.65) | 2.95 (0.60) | 2.98 (0.64) | 0.42 (0.34 to 0.49)   | <0.001 | 0.45 (0.38 to 0.53)    | <0.001 |
| <b>Self-monitoring<br/>and insight<br/>(137)</b>                  | 3.06 (0.41) | 3.24 (0.37) | 3.26 (0.37) | 0.46 (0.42 to 0.51)   | <0.001 | 0.51 (0.47 to 0.56)    | <0.001 |
| <b>Constructive</b>                                               | 3.09 (0.47) | 3.24 (0.46) | 3.27 (0.47) | 0.32 (0.27 to 0.38)   | <0.001 | 0.38 (0.33 to 0.44)    | <0.001 |

|                                              |             |             |             |                      |        |                      |        |
|----------------------------------------------|-------------|-------------|-------------|----------------------|--------|----------------------|--------|
| <b>attitudes and approaches (142)</b>        |             |             |             |                      |        |                      |        |
| <b>Skill and technique acquisition (141)</b> | 2.85 (0.50) | 3.09 (0.43) | 3.12 (0.48) | 0.52 (0.46 to 0.57)  | <0.001 | 0.55 (0.50 to 0.61)  | <0.001 |
| <b>Social integration and support (142)</b>  | 2.98 (0.54) | 3.09 (0.54) | 3.13(0.56)  | 0.20 (0.14 to 0.27)  | 0.003  | 0.27 (0.21 to 0.34)  | <0.001 |
| <b>Health service navigation (143)</b>       | 3.28 (0.41) | 3.39 (0.42) | 3.35 (0.44) | 0.27 (0.22 to 0.31)  | 0.006  | 0.17 (0.11 to 0.21)  | 0.104  |
| <b>Score SEM-CD (136)</b>                    | 7.41 (1.82) | 7.94 (1.57) | 7.76 (1.94) | 0.31 (0.11 to 0.51)  | <0.001 | 0.19 (-0.04 to 0.41) | 0.025  |
| <b>PCS (143)</b>                             | 42.4 (9.8)  | 45.8 (9.3)  | 46.7 (9.8)  | 0.36 (-0.75 to 1.46) | <0.001 | 0.44 (-0.69 to 1.57) | <0.001 |

1  
2  
3  
4  
5  
6  
7  
8  
9  
10  
11  
12  
13  
14  
15  
16  
17  
18  
19  
20  
21  
22  
23  
24  
25  
26  
27  
28  
29  
30  
31  
32  
33  
34  
35  
36  
37  
38  
39  
40  
41  
42  
43  
44  
45  
46  
47  
48  
49

|                        |               |               |               |                                            |          |                                         |          |
|------------------------|---------------|---------------|---------------|--------------------------------------------|----------|-----------------------------------------|----------|
| <b>MCS (143)</b>       | 46.8 (10.9)   | 49.5 (10.1)   | 49.4 (10.2)   | 0.26 (-0.96 to 1.47)                       | <0.001   | 0.25 (-0.97 to 1.47)                    | 0.002    |
| <b>SF-6D (140)</b>     | 0.661 (0.108) | 0.698 (0.113) | 0.704 (0.106) | 0.34 (0.32 to 0.35)                        | <0.001   | 0.40 (0.39 to 0.42)                     | <0.001   |
| <b>BMI (132)</b>       | 31.6 (6.7)    | 31.3 (7.5)    | 30.6 (6.8)    | -0.04 (-0.90 to 0.81)                      | 0.531    | -0.15 (-0.96 to 0.66)                   | <0.001   |
| <hr/>                  |               |               |               |                                            |          |                                         |          |
|                        |               | <b>n (%)</b>  |               | <b>Relative Risk *</b><br><b>(95 % CI)</b> | <b>p</b> | <b>Relative Risk</b><br><b>(95% CI)</b> | <b>p</b> |
| <b>PD (140)</b>        | 15 (10.7)     | 8 (5.7)       | 12 (8.6)      | 0.53 (0.23 to 1.22)                        | 0.092    | 0.80 (0.39 to 1.65)                     | 0.581    |
| <b>F &amp; V (140)</b> | 48 (34.3)     | 79 (56.4)     | 70 (50.0)     | 1.65 (1.25 to 2.16)                        | <0.001   | 1.46 (1.10 to 1.94)                     | <0.001   |
| <b>PA (143)</b>        | 14 (9.8)      | 30 (21.0)     | 23 (16.1)     | 2.14 (1.19 to 3.87)                        | 0.002    | 1.64 (0.88 to 3.06)                     | 0.093    |

\* Student’s paired t-test for continuous variables, and McNemar’s test for categorical variables (calculated only for subjects with data at the three measuring times). Baseline was the reference category in Relative Risk calculation.

Mean difference for Cohen’s d effect size was calculated as (Mean 3months - Mean Baseline) and (Mean 12 months - Baseline).

SEM-CD = Self-Efficacy for Managing Chronic Disease; PCS = Physical Component Summary of SF-12; MCS = Mental Component Summary of SF-12; SF-6D = Single index of SF-12; BMI = Body Mass Index (Kg/m<sup>2</sup>); DP = Presence of psychological distress; F&V = Recommended fruit and vegetables; PA = Recommended physical activity.

**Table 6.** Comparison at one year in the quasi-experimental design.

| Variable*        | Groups A and B |            | Group C     |             | Groups A and B vs. Group C at 12 months |        |
|------------------|----------------|------------|-------------|-------------|-----------------------------------------|--------|
|                  | Baseline       | 12 months  | Baseline    | 12 months   | Cohen's d (95% CI)                      | p**    |
|                  | Mean (SD)      |            | Mean (SD)   |             |                                         |        |
| <b>PCS</b>       | 43.6 (10.3)    | 45.6 (9.7) | 43.6 (11.7) | 43.8 (11.3) | 0.17 (-0.63 to 0.97)                    | 0.011  |
| <b>MCS</b>       | 47.1 (10.8)    | 49.6 (9.6) | 47.2 (10.6) | 48.9 (10.3) | 0.07 (-0.69 to 0.83)                    | 0.258  |
| <b>BMI</b>       | 31.8 (7.2)     | 30.7 (7.0) | 30.6 (6.1)  | 30.6 (6.3)  | 0.02 (-0.49 to 0.52)                    | <0.001 |
|                  | n (%)          |            | n (%)       |             | Odds ratio (95% CI)                     | p      |
| <b>PD</b>        | 34(10.3)       | 17(5.4)    | 40(12.0)    | 31(9.4)     | 1.03 (0.59 to 1.80)                     | 0.103  |
| <b>F &amp; V</b> | 103(31.0)      | 127(45.4)  | 147(45.2)   | 177(56.0)   | 1.31 (0.90 to 1.90)                     | 0.155  |
| <b>PA</b>        | 39(11.8)       | 49(17.5)   | 60(18.2)    | 56(17.1)    | 0.77 (0.48 to 1.23)                     | 0.266  |

\* PCS = Physical Component Summary of SF-12; MCS = Mental Component Summary of SF-12; BMI = Body Mass Index (Kg/m<sup>2</sup>);

DP = Presence of psychological distress; F&V = Recommended fruit and vegetables; PA = Recommended physical activity.

\*\* ANCOVA (continuous variables) or logistic regression (dichotomous variables), adjusting for scores at baseline, age and sex

1  
2  
3 **Figure legends**  
4

5 **Figure 1.** Flow diagram of PRIMAC study.  
6

7 **Figure 2.** Relative risk (RR) and 95% confidence interval (95% CI) of a reliable  
8 improvement from baseline at 3 months in Group A (Group B as reference category) for  
9  
10 each domain of self-management.  
11  
12  
13

14 **Figure 3.** Distribution of changes in Group A from baseline over a year in self-  
15 management domains. Numbers inside the bars show absolute numbers of patients.  
16  
17  
18  
19  
20  
21  
22  
23  
24  
25  
26  
27  
28  
29  
30  
31  
32  
33  
34  
35  
36  
37  
38  
39  
40  
41  
42  
43  
44  
45  
46  
47  
48  
49  
50  
51  
52  
53  
54  
55  
56  
57  
58  
59  
60

Confidential

Figure 1

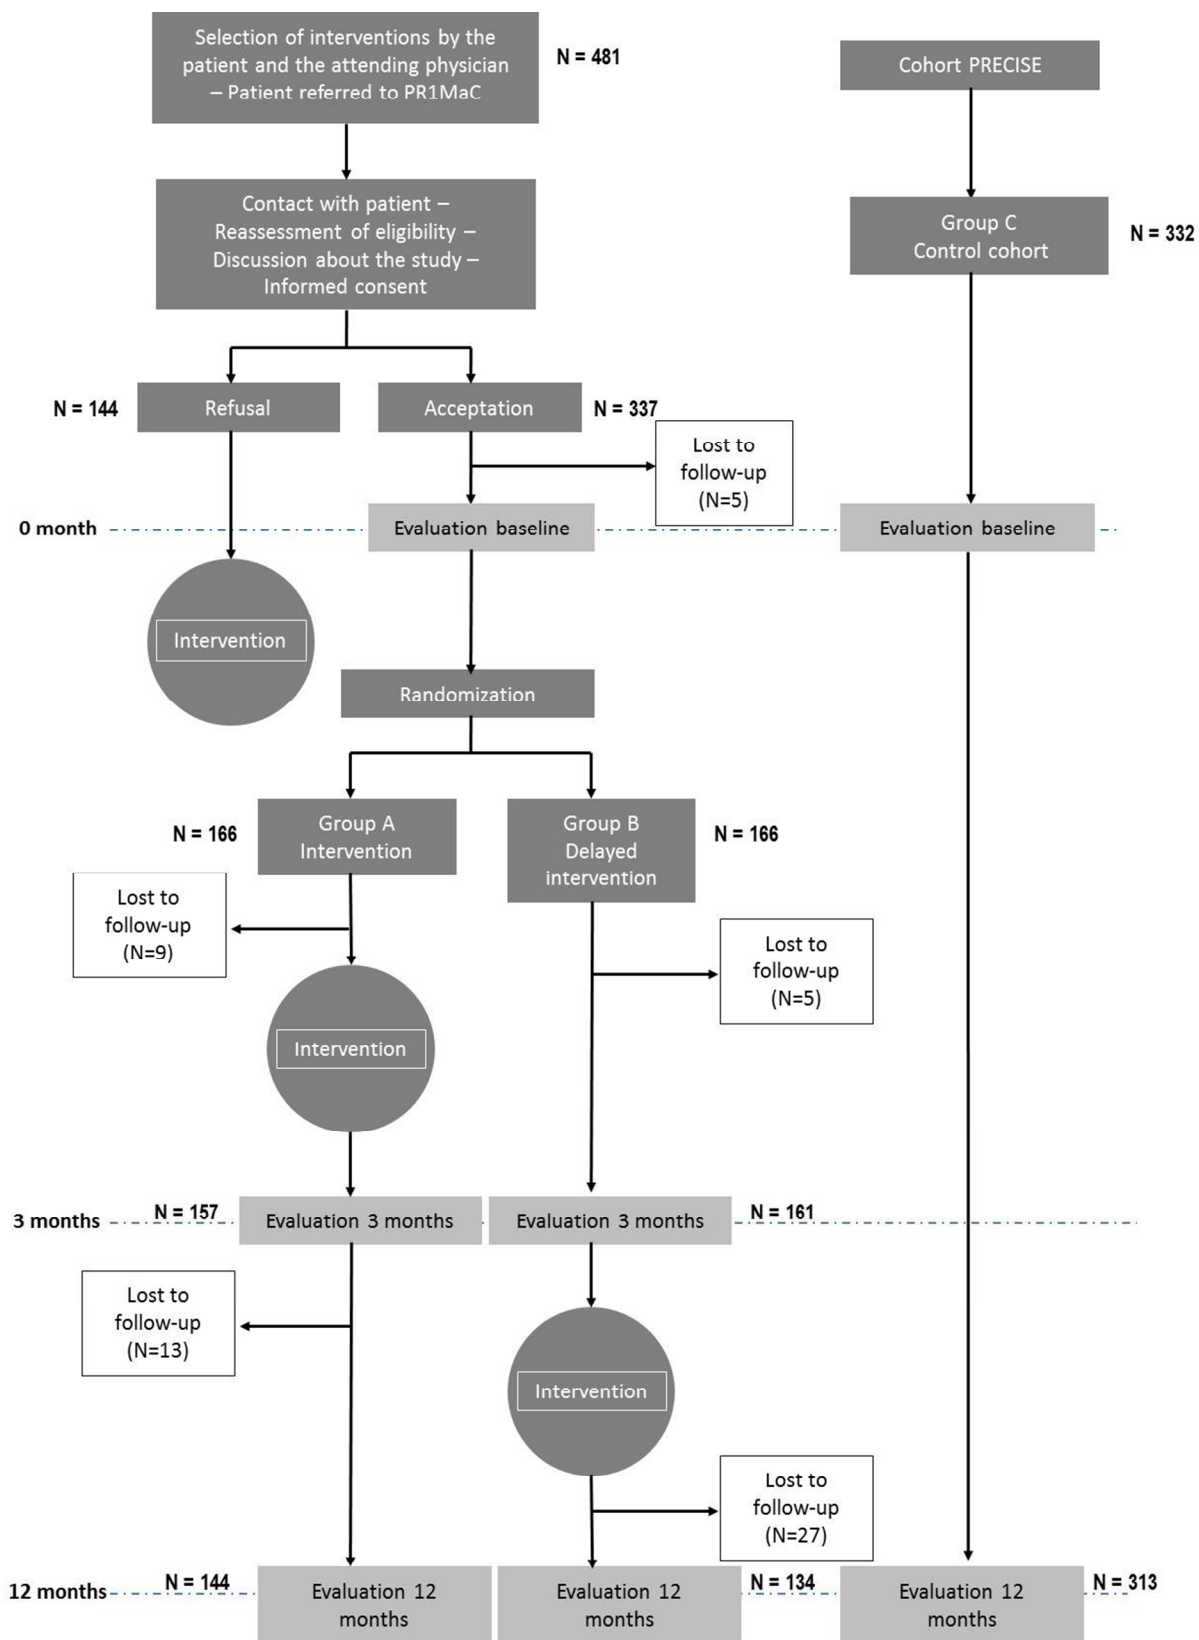

1  
2  
3  
4  
5  
6  
7  
8  
9  
10  
11  
12  
13  
14  
15  
16  
17  
18  
19  
20  
21  
22  
23  
24  
25  
26  
27  
28  
29  
30  
31  
32  
33  
34  
35  
36  
37  
38  
39  
40  
41  
42  
43  
44  
45  
46  
47  
48  
49  
50  
51  
52  
53  
54  
55  
56  
57  
58  
59  
60

Figure 2

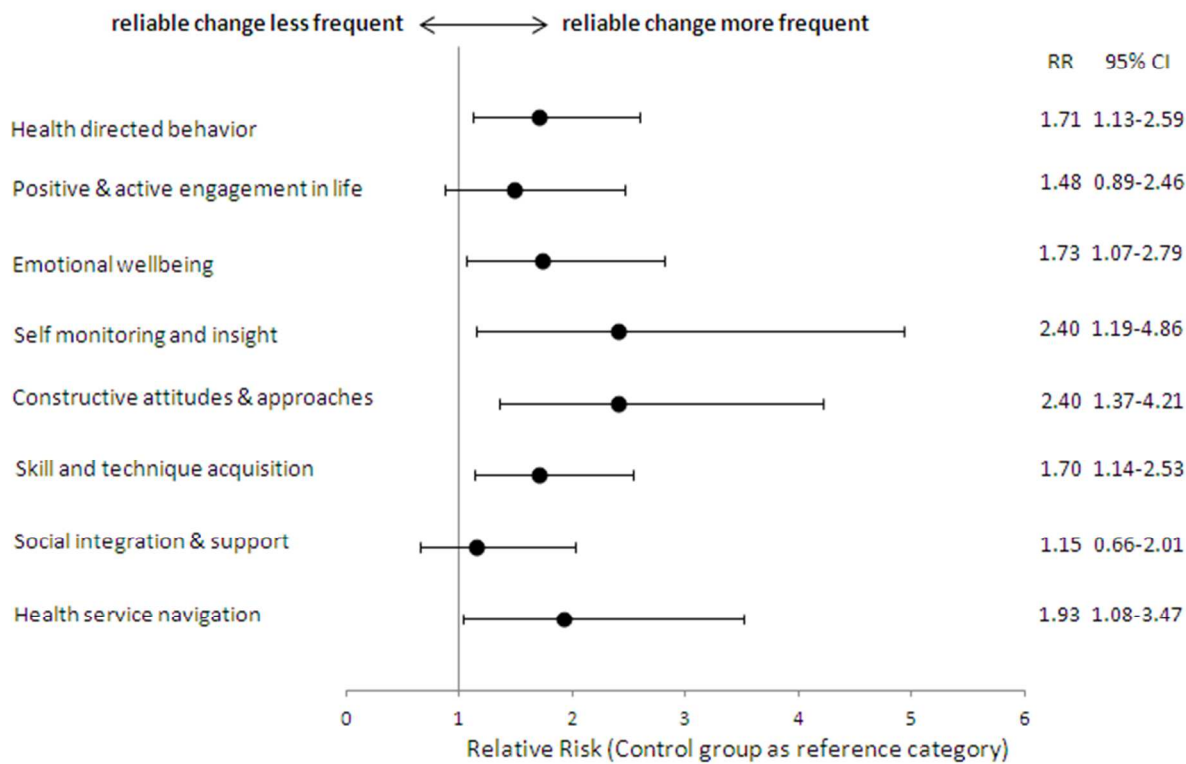



Figure 3

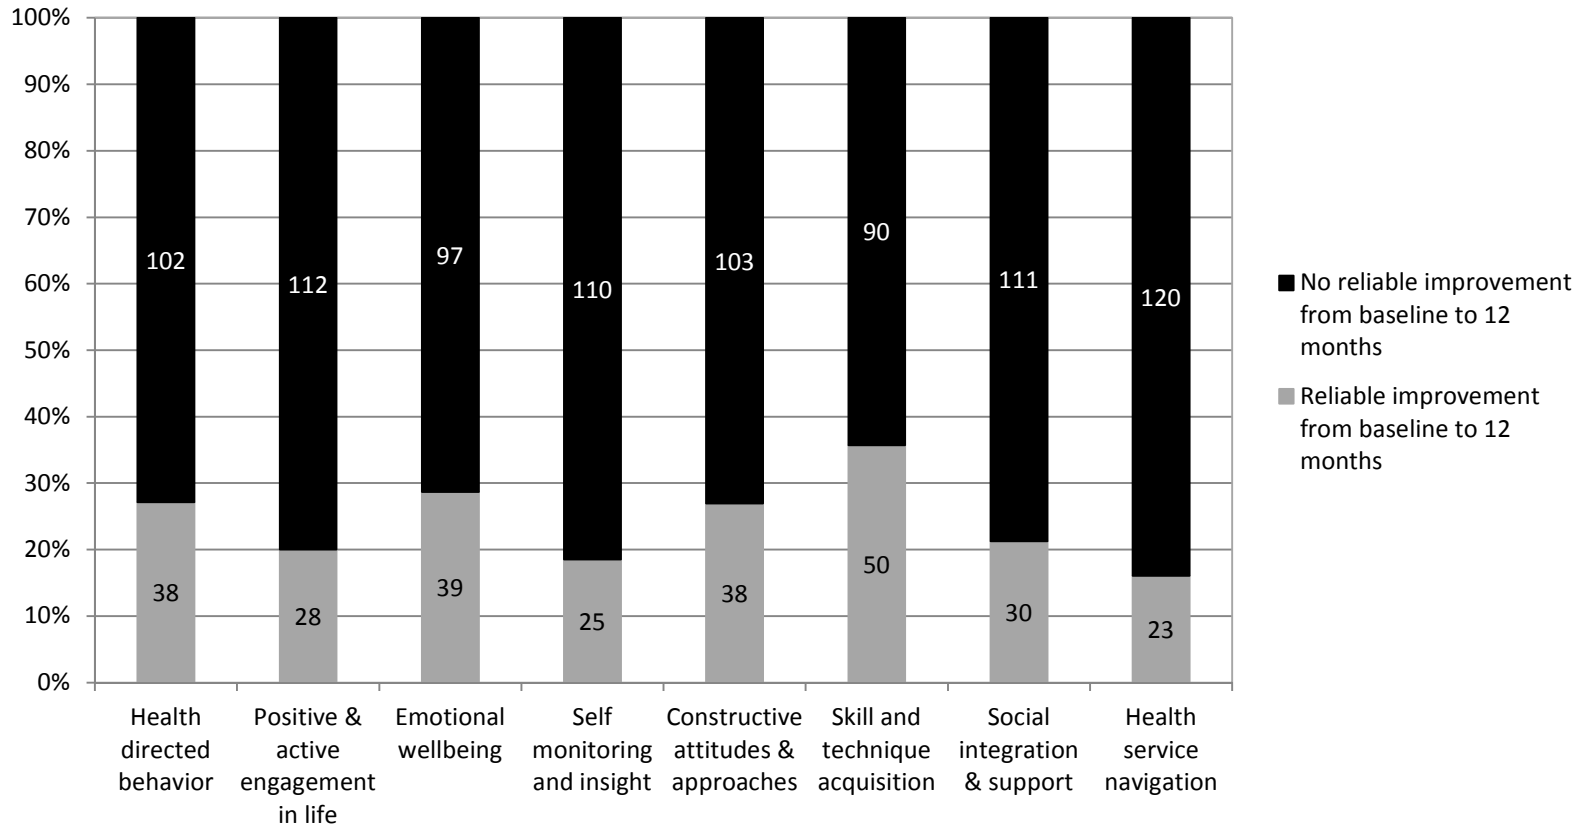

Supplement: open-2016-0031-original-submission.pdf [file open-2016-0031-original-submission.pdf]
